1 **Knowledge, attitude, and practices of reporting adverse events**  
2 **following immunization among healthcare providers in Simiyu**  
3 **Region, Tanzania: A cross sectional study**

4

5

6 **Raphael C. Kambona<sup>1,\*</sup>, Alphonse I. Marealle<sup>1,¶</sup>, Manase Kilonzi<sup>1,¶</sup>, Emmanuel**  
7 **Masunga<sup>2,¶</sup>, Peter Kunambi<sup>3,&</sup>, Helfrid B. Ilomo<sup>1,¶</sup>, Ritah Mutagonda<sup>1,^</sup>**

8

9 1. Department of Clinical Pharmacy and Pharmacology, Muhimbili University of Health and  
10 Allied Science, Dar es Salaam, Tanzania, 2. Tanzania Medicine and Medical Devices Authority,  
11 3. Department of Pharmacology Muhimbili University of Health and Allied Science, Dar es  
12 salaam-Tanzania.

13

14 Raphael Christopher Kambona

15 Muhimbili University of Health and Allied Sciences

16 P.O Box 65001

17 Dar es Salaam, Tanzania

18 \* [famousrkr@gmail.com](mailto:famousrkr@gmail.com)

19

20 **Abstract:**

21 **Introduction:** Immunization is the most cost effective health intervention in the history of  
22 mankind. Its role in reducing the morbidities and mortality due to vaccine-preventable diseases is  
23 significant. Despite vaccines being important in saving lives; adverse events following  
24 immunization (AEFI) do occur that need prompt detection, management, and then reported,  
25 analyzed, and the findings being shared with all stakeholders to ensure vaccine safety. The  
26 reporting of AEFI in Tanzania is still low. Health Care Providers (HCPs) are obliged to collect and  
27 report AEFI. This study assessed the knowledge, attitude, and practices of reporting AEFI among  
28 HCPs in Simiyu region, Tanzania.

29 **Methodology:** This cross-sectional study was conducted between May and June 2024. A total of  
30 180 HCPs were enrolled, structured questionnaire was used to assess the knowledge, attitude, and  
31 practices of reporting AEFI among HCPs at primary health facilities. Statistical Package for Social  
32 Science (SPSS) was used for entry and data analysis, and the findings were summarized using  
33 frequency and percentages. Chi-square test was used to screen for factors associated with AEFI  
34 reporting while Poisson regression model was used to confirm the determinants.

35 **Results:** The median age of study participants was 32 (Inter Quartile Range; 29, 38) years. Among  
36 the HCPs, more than one quarter (28.89%) had adequate knowledge of reporting AEFI, and more  
37 than half (68.89%) had positive attitudes and good practices (62.22%) of reporting AEFI. Less  
38 than half of HCPs (48.3%) had encountered AEFI cases, and about two-thirds (69%) reported it.

39 **Conclusions and recommendations:** Despite the inadequacy of knowledge on reporting AEFI  
40 among HCPs, the attitude and practices of reporting AEFI among HCPs were promising. Based  
41 on the study findings, we recommend more training on vaccine surveillance, routine follow-up,  
42 and supportive supervision of AEFI surveillance for optimal AEFI reporting and vaccine safety

43 surveillance in Tanzania.

44

45 **Keywords:** Adverse events following immunization, knowledge, attitude, practices, Health care  
46 providers, Tanzania

47

## 48 **Introduction**

49 Vaccination is one of the most successful public health interventions; globally it has significantly  
50 reduced morbidity and mortality associated with Vaccine Preventable Diseases (VPD). Worldwide  
51 2 to 3 million deaths due to VPD are being prevented yearly(1–4). As the number of vaccines  
52 increased in routine immunization programs, the safety measures including Adverse Event  
53 Following Immunization (AEFI) reporting should also increase through passive surveillance of  
54 vaccines (3,5,6).

55 Even though vaccine production is closely monitored; each vaccine is accompanied by a kind of  
56 risk known as Adverse Event Following Immunization (AEFI). AEFI is any untoward medical  
57 event occurring following vaccination related to the vaccine administration and or its handling,  
58 and may not necessarily have a causal relationship with the vaccine use. The adverse event may  
59 be any unfavorable or unintended sign, an abnormal laboratory finding, symptoms, or disease (7,8).

60 Surveillance for AEFI can be active, passive, or stimulated. Active surveillance involves intensive  
61 follow-up of the cases, laboratory investigation, and questionnaires. In contrast, passive  
62 surveillance depends on individual, unsolicited reporting, the ability to identify, and  
63 the willingness of HCPs to report AEFI. Passive reporting of AEFI is the primary responsibility

64 of HCPs for safety and post-marketing surveillance of vaccines (9–11). The main goal of AEFI  
65 surveillance is to promptly detect, manage, and take safety regulatory actions.

66 The reporting rate of AEFI in the WHO-African region is inconsistent and varies among member  
67 countries. The underreporting is attributed to weak AEFI monitoring systems, lack of guidelines  
68 and review committees, insufficient trained personnel, and inadequate stakeholder collaboration  
69 (12–15). In Tanzania, vaccine safety surveillance is managed by the Immunization and Vaccine  
70 Development (IVD) and the Tanzania Medicines and Medical Devices Authority (TMDA).  
71 However, even with this coordination, AEFI reporting remained suboptimal in the country (16).

72 This study assessed the knowledge, attitude, and practices of reporting AEFI among HCPs in  
73 Simiyu Region, it came up with the findings and proposed recommendations for improving AEFI  
74 reporting in Tanzania. The increase in AEFI reporting will increase vaccine safety within the  
75 country, promote immunization coverage, and reduce VPD.

76

## 77 **Methods**

### 78 **Design and settings**

79 This study used an analytical cross-sectional design, it was conducted from May to June 2024  
80 in primary health facilities providing vaccination services in Bariadi district in Simiyu Region.  
81 Bariadi district is located in the eastern lake zone of Tanzania; it comprises Bariadi District  
82 Council and Bariadi Town Council. The study involved Bariadi District Hospital, Bariadi Town  
83 Hospital, Songambe Hospital, and other 39 primary health facilities.

84

85

86 **Study population**

87 This study involved Routine Immunization Service Providers, clinicians at outpatient  
88 department (OPD), and Pharmacy personnel working at primary health facilities in Bariadi  
89 district. A total of 221 Healthcare providers were included and signed the informed consent. Of  
90 221 HCPs who consented to the study, only 180 (81.4%) responded fully to the questionnaire  
91 and took part in the final analysis.

92 **Data collection tools**

93 Data were collected using a semi-structured questionnaire administered face-to-face to  
94 participants. The questionnaire was developed by adapting similar studies and modified to meet  
95 the study objectives (17,18). The questionnaire was pre-tested through the online survey and re-  
96 developed accordingly to fit data collection based on study objectives. The questionnaire  
97 consisted of 6 items on demographic information, 9 semi-structured questions on knowledge, 7  
98 questions on attitude, and 6 questions on practices. Before conducting the interview; informed  
99 consent forms were provided to study participants.

100 **Data collection procedures**

101 **Administering the questionnaire:** Study participants were recruited before conducting the  
102 study by the principal investigator and District Pharmacists. The district Pharmacist were  
103 working and supervising within their respective districts. Detailed information on the study was  
104 given to each participant, and raised questions were clarified before the participant was asked  
105 to sign the consent form. An average of 1 hour was given to participants to respond to

106 questionnaire before collecting it back. After the consent, the questionnaire was given which  
107 was face to face administered and responses were provided accordingly.

### 108 **Data analysis**

109 Both descriptive and inferential statistics were used to analyze the data collected, and continuous  
110 variables were presented as median and interquartile ranges. All categorical variables were  
111 presented in proportion and frequency. Level of knowledge, attitude, and practice were  
112 measured as the primary outcomes. The knowledge part consisted of 9 questions; the obtained  
113 proportion was multiplied by 100 to attain the percentage of knowledge for each participant.  
114 Knowledge was classified as “adequate” for scores  $\geq 75\%$ , and “inadequate” for scores less than  
115 75% (19,20).

116 A set of 7 questions was used to ascertain the attitude of study participants, the responses to the  
117 question ranged from “strongly disagree, disagree, neutral, agree and strongly agree” in which  
118 the true statement was scored 1,2,3,4,5 concerning strongly disagree, disagree, neutral, agree  
119 and strongly agree statements. The false statement scored 5,4,3,2,1 marks for strongly disagree,  
120 disagree, neutral, agree, and strongly agree respectively. The proportion of attitudes  
121 for each participant was obtained by calculating the sum of all correct responses divided by all  
122 possible correct responses. HCP who scored marks between 21-35 was deemed to have  
123 a positive attitude on AEFI reporting, scored less than 21 marks was deemed to negative attitude  
124 on AEFI reporting (20).

125 There was a set of 6 questions that ascertained the practice of AEFI reporting, each question had  
126 1 mark; the HCP who scored 3-6 questions was deemed to have good practice on AEFI

127 reporting, scoring less than 3 questions was deemed to poor practice of reporting AEFI (20)(19).  
128 On Social demographic data, age was measured in years, duration of practice was measured in  
129 years 1-4 years was regarded as junior HCPs, 5-10 years was regarded as seniors, and more than  
130 10 years was regarded as principals. Gender was measured by giving options such as male and  
131 female, professional and qualification based on the level of education ranging from certificate,  
132 diploma, and bachelor degree, and the level of the facility either Hospital, Health center, or  
133 dispensary. Chi-squared test of association and Poisson regression with robust standard errors  
134 model were used to observe significance between categorical variables in reporting of AEFI.  
135 Microsoft Excel and Statistical Package for Social Science (SPSS) version 23 were used for data  
136 entry and analysis. The confidence level was set at 95% and the p-value at 0.05. The data were  
137 cleaned and analyzed as per study objectives. All variables that were significant in the Chi-  
138 square were subjected to Poisson regression with robust standard error analysis to determine the  
139 relationship between demographic/other independent variables of the respondent on reporting  
140 of AEFI.

141

#### 142 **Ethical consideration**

143 Ethical clearance to conduct this study was obtained from the MUHAS-Institutional Review  
144 Board before conducting the study (Reference no. MUHAS-REC-03-2024-2066, and its  
145 approval amendment referenced DA.282/298/06/C/767)).Prior to commencement of the study,  
146 the participants were given information on voluntarily practice of participation, the  
147 confidentiality of the information provided were guaranteed, and freedom to withdraw in the

148 study anytime whatever they feel were given without any penalties imposed. No participants  
149 names were indicated in the questionnaire, instead numbers were used to ensure confidentiality.

150

## 151 **Results**

152 A total of 221 Health Care Providers (HCPs) were recruited for this study, but 180 respondents  
153 completely filled out the questionnaire and were included in the final analysis which accounted  
154 Participant's response rate of 81.4%.

### 155 **Socio-demographic characteristics of study participants**

156 About half of the HCPs (56.7 %, n=102) were females. More than half (63.3%, n=114) were  
157 married, more than three quarters (78.3%, n=141) had college education, about half (53.9%,  
158 n=97) had a diploma as highest professional education, and more than one third (41.1%, n=74)  
159 were nurses. Participant's median age was 32 years. Most of HCPs (67.8%, n=122) were  
160 middle-aged ( $\leq 35$  years), more than one third (44.4%, n=80) had 1-4 years of working  
161 experience and most (76.1%, n=137) of HCPs were directly involved in routine immunization  
162 services. (*Table 1*).

163

### 164 **Knowledge on AEFI reporting**

165 The overall proportion of HCPs with adequate knowledge of reporting AEFI was 28.9% (n=52),  
166 while 71.1% (n=128) had inadequate knowledge. Most HCPs (72.8%, n=131) correctly defined  
167 AEFI. The majority of HCPs (95.6%, n=172) were aware of reportable AEFI cases which



168 comprised serious and non-serious cases; only few participants (4.4%, n=8) considered only  
169 serious AEFI should be reported. Most of HCPs (92.8%, n=167) heard AEFI surveillance on  
170 reliable sources, and the majority (93.3%, n=168) heard about AEFI surveillance. Few  
171 participants (6.7%, n=12) knew various modalities of reporting AEFI, while more than three  
172 quarter of Participants (77%, n=139) used individual case safety report (yellow form) as the  
173 means of reporting AEFI. Few HCPs (9.4%, n=17) had the knowledge on the types of AEFI as  
174 classified by WHO based on vaccine product related, vaccine quality defect, immunization  
175 anxiety, immunization error, and coincidental. About one quarter of the participants (26.1%,  
176 n=47) knew AEFI cases subject for investigation, and most of the HCPs (90.6%, n=163) know  
177 AEFI can be prevented but among them only few HCPs (27.8%, n=50) know the methods to  
178 prevent AEFI. (*Fig 1*)

179

### 180 **Participant's attitude on AEFI reporting**

181 Of the 180 respondents, 96.7% (n=174) agreed on the importance of AEFI training towards  
182 improving AEFI reporting, and the majority of respondents (90.6%, n=163) agreed that it is  
183 their professional obligation to report AEFI. Most of respondents (96.7%, n=174) agreed that  
184 AEFI reporting improves patient care since prompt action and further management will be given  
185 to the Patient when AEFI is reported. Few respondents (18.3%, n=33) reported that AEFI creates  
186 additional work while others (13.3%, n=24) considered reporting AEFI as a time-consuming  
187 activity, and some (7.2%, n=13) could not report AEFI by fearing of being victimized by their  
188 bosses (*Fig 2*). Generally, the majority of participants (68.89%) had a positive attitude toward  
189 reporting AEFI.

191 **Practices of reporting AEFI**

192 The majority of the HCPs (62.22%, n=112) had good practices of reporting AEFI, and most  
193 (69.4%, n=125) elaborated the procedures of handling, managing, and reporting of AEFI. Less  
194 than half of HCPs (48.3%, n=87) encountered AEFI cases during their routine practices, and  
195 two third (69%, n=60) reported it. Less than half (47.2%, n=85) provided reasons for  
196 underreporting AEFI with the responses ranging from; not aware of the importance of reporting  
197 AEFI (43%), don't know how to report AEFI (3.5%), AEFI are self-limiting (30.4%), no follow  
198 up by the administrators (11.7%), fear of being victimized by their bosses (8.3%) and other  
199 reasons (3.0%). Most HCPs (96.7%, n=174) were unfamiliar with the variety of modalities of  
200 reporting AEFI. The mostly used method for reporting AEFI was individual case safety report  
201 (yellow form) (66.5%), other reporting modalities were phone calling to Tanzania Medicines  
202 and Medical Devices Authority (TMDA) /District (15.8%), using TMDA website (6.2%), Toll  
203 free number (5.3%), mobile application (3.8%), and email (2.4%). (*Fig 3*)

204

205 **Factors associated with Participants' knowledge, attitude, and practices on reporting**  
206 **AEFI**

207 Among the socio-demographic characteristics, Participants who reported AEFI did not differ  
208 from those who did not report AEFI with regard to age group, gender, marital status, cadre,  
209 involvement in routine immunization, and level of education. The highest professional  
210 education was statistical significantly associated with knowledge of reporting AEFI ( $p=0.002$ ).  
211 (*Table 2*). Among the attitude characteristics, participants who reported AEFI did not differ from  
212 those who did not report AEFI with regards to age group, gender, marital status, cadre, level of

213 education, working experience, involvement in Routine immunization services, and highest  
214 professional education. The knowledge was significantly associated with attitudes of reporting  
215 AEFI, the participants with knowledge of AEFI reporting were more likely to have positive  
216 attitude of reporting AEFI. (*Table 3*). Among the practice characteristics of participants, socio-  
217 demographic characteristics were not statistically significantly associated with the Practices of  
218 reporting AEFI. The practices of reporting AEFI were significantly associated with knowledge  
219 and attitude ( $p < 0.05$ ). Multivariable analysis showed participant's age group  $\leq 35$  years  
220 ( $p=0.011$ ), working experiences 1-4 years ( $p=0.025$ ), working experience of 5-10 years  
221 ( $p=0.033$ ), and adequate knowledge on reporting AEF ( $p < 0.001$ ) being significant associated  
222 with good practices of reporting AEFI (*Table 4*).

223

## 225 **Discussion**

226 Vaccine safety surveillance is the cornerstone for vaccine safety and quality in immunization  
227 programs (1,19,20). Public mistrust of vaccines and vaccine hesitancy are the results of poorly  
228 detection and communication on AEFI; thus, Health Care Providers (HCPs) need to have good  
229 knowledge, attitude, and practices of reporting AEFI for building trust and optimal vaccine  
230 uptake by the community (21). Various studies on Health care provider's knowledge, attitude,  
231 and practices of reporting AEFI have been conducted, but little is known in Tanzania (18,22,23).  
232 This analytical cross sectional study assessed knowledge, attitude, and practices of reporting  
233 AEFI among HCPs in Simiyu region, Tanzania.

234 In this study 28.89% (n=52) of HCPs were found to have adequate knowledge of reporting  
235 AEFI, which is similar to the same study conducted in Kenya by *Masika C. et al* in 2016 which  
236 showed 29.2% of HCPs had adequate knowledge. The finding of this study is contrary to the  
237 studies conducted in Nigeria and Ghana, in which 63.6% and 57.8% of HCPs had adequate  
238 knowledge on AEFI reporting respectively (19)(24). The inadequate of knowledge of reporting  
239 AEFI could be explained by inadequate supportive supervision on AEFI surveillance and the  
240 inadequate pre-service pharmacovigilance training in Tanzania (25).

241 In this study, the majority of HCPs (72.8%, n=131) correctly defined AEFI, this is similar to the  
242 same studies conducted in Ghana and in Nigeria in which 83.4% and 70% respectively correctly  
243 defined AEFI (24,26). This study shows HCPs characteristics of the highest professional  
244 education associated with good knowledge of reporting AEFI. Other demographic factors like  
245 age, marital status, involvement in routine immunization, working experiences, and cadres had  
246 no association with knowledge of reporting AEFI which is similar to the study by *Parella A et*  
247 (11).

248 Our study showed the majority of HCPs (68.89%, n=124) had a positive attitude towards  
249 reporting AEFI. The majority of HCPs (96.7%, n=174) agreed on the importance of training on  
250 AEFI reporting, this is similar to the same study conducted in Nigeria (19). The attitude of  
251 reporting AEFI was statistically significantly associated with the knowledge of reporting AEFI  
252 among HCPs (p=0.004) while other demographic characteristics like age, gender, marital status,  
253 and working experiences were not associated with the attitude of reporting AEFI. In our study,  
254 knowledge of AEFI reporting was significantly associated with the attitude of reporting AEFI  
255 (p=0.004), the finding is similar to the studies conducted in Ghana (2,24).

256 Some HCPs had a negative attitude and thought that; reporting AEFI creates additional work  
257 (18.3%, n=33), and reporting AEFI is a time-consuming activity (13.3%, n=24) as well as the  
258 fear of being victimized by their bosses (7.2%, n=13). The findings on negative attitudes  
259 replicate the study by *Malande.O et al* in Kenya, *Yamoah.P et al* in Ghana, *Laryea E. et al* in  
260 Ghana, and *Thomas.R et al* in India (2,13,21,24).

261 Surprisingly; working in routine immunization clinics was not associated with positive attitudes  
262 toward reporting AEFI, this is contrary to the similar studies in Ghana and Nigeria in which  
263 those HCPs working in Routine immunization clinics had a several-fold increase in good  
264 attitudes on reporting AEFI (20)(27). The reasons for working in routine immunization clinics  
265 having no association with positive attitudes on reporting AEFI could be influenced by myths  
266 during COVID 19 pandemic and political influences on vaccine safety (28). All stakeholders  
267 should ensure positive attitudes on reporting AEFI by HCPs for effective vaccine surveillance,  
268 since it is evident that; negative attitudes of HCPs do hinder AEFI reporting (4).

269 Our study shows that more than a half (62.22%, 112) of HCPs had good practices of reporting  
270 AEFI, the finding is similar to studies conducted in Nigeria (14,19).The majority (62.22%) of  
271 HCPs having a good practices of reporting AEFI could be attributed by previously sensitization  
272 meetings organized by Tanzania Medicines and Medical Devices Authority on reporting AEFI  
273 to HCPs. More than one-third (48.3%, n=87) of HCPs had encountered AEFI cases during their  
274 routine practices, of 87 HCPs who encountered AEFI, the majority (69%, n=60) reported it. The  
275 majority of the HCPs (69.4%, n=125) handled the AEFI cases appropriately upon encountering  
276 AEFI cases; they managed the case accordingly whether serious or non-serious and then  
277 reported it.

278 Less than a half of HCPs (47.2%, n=85) provided reasons for underreporting AEFI; of 230  
279 provided reasons; the HCPs declared not aware of the importance of reporting AEFI (43%),  
280 AEFI are self-limiting (30.4%), no follow up by the administrators (11.7%), fear of being  
281 victimized (8.3%), they don't know how to report AEFI (3.5%), and some provide other reasons  
282 (3.0%) which included; never encountered any AEFI case and it is not their responsibility to  
283 report AEFI. The findings on the reasons for underreporting AEFI reflect similar studies  
284 conducted in India, Zimbabwe, Ghana, Nigeria, and Kenya (13,15,19,21,24)

285 The provided reasons for the underreporting of AEFI should be worked on by the Government  
286 and all stakeholders to enhance AEFI reporting within the country for effective vaccine safety  
287 surveillance. This study shows more than three-quarter of HCPs (96.7%, n=174) did not use a  
288 variety of modalities for reporting AEFI which could had contributed to AEFI underreporting.  
289 Of modalities used for reporting AEFI; yellow form was mostly used (66.5%) compared to other  
290 modalities which include phone calling to National Regulatory Authority (15.8%), using  
291 website (6.2%), using toll-free number 080008110084 (5.3%), using mobile application (3.8%),  
292 and by using email (2.4%). The finding of this study is similar to the same study conducted in  
293 Nigeria in 2020 in which the majority of HCPs (95.1%) used Individual Case Safety Report  
294 (yellow form) as the main modality for AEFI reporting (19). Tanzania Medicines and Medical  
295 Devices Authority, and Immunization and Vaccine Development should ensure the utilization  
296 of other appropriate modalities for reporting AEFI including vigimobile for effective increase  
297 AEFI reporting and subsequent vaccine safety surveillance.

298

299 **Strengths and Limitations**

300 The tool used for assessing participants' knowledge, attitude, and practices was based on other  
301 colleagues' and pharmacovigilance experts' knowledge which justified its validity. This study  
302 faced several limitations including recall bias to HCPs when responding to some questionnaire.  
303 The principal investigator provided further information to verify the questions. This study was  
304 conducted only to HCPs and excluded the clients/parents, this is another limitation towards  
305 assessment of knowledge, attitude and practices of reporting AEFI since both HCPs and  
306 clients/parents are obliged to report AEFI. This gave one sided finding on AEFI reporting based  
307 on HCP's perspective.

308

309 **Conclusions and recommendations**

310 This study showed less than one third (28.9%, n=52) of HCPs had adequate knowledge of  
311 reporting AEFI. Despite the inadequacy of knowledge on AEFI reporting by majority of HCPs;  
312 the findings revealed more than a half HCPs (68.89%, n=124) had a positive attitudes and good  
313 practices (62.22%, n=112) of reporting AEFI. More than one third (48.3%, n=87) of HCPs had  
314 encountered AEFI cases during their routine practices, and majority of them (69%, n=60)  
315 reported it. The study findings revealed association between adequate knowledge of reporting  
316 AEFI with highest professional education, positive attitude of reporting AEFI with knowledge  
317 of reporting AEFI, and good practices of reporting AEFI with adequate knowledge. We do  
318 recommend the aforementioned reasons for underreporting, gaps on HCP's knowledge, attitude,  
319 and practices to be intervened by relevant stakeholders for effective AEFI reporting and  
320 subsequent vaccine safety surveillance within the country.

321

322 **Supporting information**

323 Questionnaire

324 Consent form

325 Ethical approval

326

327 **Acknowledgment**

328 We firmly acknowledge the real cooperation we received from Bariadi district executive  
329 director, Bariadi Town Director, District medical officers, District Pharmacists, Participants,  
330 and the entire staff of the School of Pharmacy, Department of Clinical Pharmacy and  
331 Pharmacology of Muhimbili University of Health and Allied Sciences.

332

333 **Author contributions**

334 Conceptualization: Raphael C. Kambona

335 Data curation: Raphael C. Kambona

336 Formal analysis: Raphael C. Kambona, Peter Kunambi, Alphonse Marealle

337 Funding acquisition: Raphael C.Kambona

338 Methodology: Raphael C.Kambona, Manase Kilonzi, Emmanuel Masunga, Helfrid B.Ilomo

339 Supervision: Raphael C.Kambona, Ritah Mutagonda, Alphonse Marealle

340 Project administration: Raphael C.Kambona

341 Validation: Raphael.C.Kambona

342 Writing-original draft: Raphael C.Kambona, Manase Kilonzi

343 Writing-review & editing: Raphael C. Kambona, Ritah Mutagonda, Alphonse Marealle, Manase

344 Kilonzi, Emmanuel Masunga.



## 346 **References**

- 347 1. WHO. Causality assessment of an adverse event following immunization. World Health  
348 Organization. 2018. Available from: <https://www.who.int/publications/i/item/9789241516990>
- 349 2. Laryea EB, Frimpong JA, Noora CL, Tengey J, Bando D, Sabblah G, et al. Evaluation of the adverse  
350 events following immunization surveillance system, Ghana, 2019. PLoS One. 2022;17(3 March).  
351 Available from: <https://doi.org/10.1371/journal.pone.0264697>
- 352 3. Joshi J, Das MK, Polpakara D, Aneja S, Agarwal M, Arora NK. Vaccine Safety and Surveillance for  
353 Adverse Events Following Immunization (AEFI) in India. 2018;85(February):139–48. Available from:  
354 <https://doi.org/10.1007/s12098-017-2532-9> PMID:29170922
- 355 4. Munube D, Bodo B, Bakainaga A, Ayebare E, Njunwamukama S, Malande OO, et al. Barriers to  
356 effective uptake and provision of immunization in a rural district in Uganda Introduction. 2019;  
357 Available from: <https://doi.org/10.1371/journal.pone.0212270> PMID:30763355
- 358 5. Guignard A, Praet N, Jusot V, Bakker M. Expert Review of Vaccines Introducing new vaccines in  
359 low- and middle- income countries: challenges and approaches. Expert Rev Vaccines.  
360 2019;18(2):119–31. Available from: <https://doi.org/10.1080/14760584.2019.1574224>  
361 PMID:30689472
- 362 6. Di A, Bonanni P, Garçon N, Stanberry LR, El-hodhod M, Tavares F, et al. Vaccine safety evaluation:  
363 Practical aspects in assessing benefits and risks. Vaccine. 2016;34(52):6672–80. Available from:  
364 <https://doi.org/10.1016/j.vaccine.2016.10.039> PMID: 27836435
- 365 7. The United Republic of Tanzania Ministry of Health Tanzania Medicines And Medical Devices  
366 Authority Guidelines For Surveillance Of Adverse Events Following Immunization (Made under

- 367 Regulation 4 (1) of the Tanzania Medicines and Medical Devices (Pharma. Vol. 255. 2022.
- 368 Available from: [https://www.tmda.go.tz/uploads/publications/en1686590851-en1679923211-](https://www.tmda.go.tz/uploads/publications/en1686590851-en1679923211-guidelines%20for%20surveillance%20of%20adverse%20events%20following%20immunization.pdf)
- 369 [guidelines%20for%20surveillance%20of%20adverse%20events%20following%20immunization.pdf](https://www.tmda.go.tz/uploads/publications/en1686590851-en1679923211-guidelines%20for%20surveillance%20of%20adverse%20events%20following%20immunization.pdf)
- 370 [f](https://www.tmda.go.tz/uploads/publications/en1686590851-en1679923211-guidelines%20for%20surveillance%20of%20adverse%20events%20following%20immunization.pdf)
- 371 8. Press WHO, Appia A, Press WHO. Global Advisory on Vaccine Safety, 2023,
- 372 <https://www.who.int/publications/i/item/who-wer9832-345-354>
- 373 9. Lei J, Balakrishnan MR, Gidudu JF, Zuber PLF. Use of a new global indicator for vaccine safety
- 374 surveillance and trends in adverse events following immunization reporting 2000–2015. *Vaccine*.
- 375 2018;36(12):1577–82. Available from: <https://doi.org/10.1016/j.vaccine.2018.02.012> PMID
- 376 29454518
- 377 10. Olsson S, Pal SN, Doodoo A. Pharmacovigilance in resource-limited countries. *Expert Rev Clin*
- 378 *Pharmacol*. 2015;8(4):449–60. Available from: <https://doi.org/10.1586/17512433.2015.1053391>
- 379 PMID 26041035
- 380 11. Parrella A, Gold M, Braunack-Mayer A, Baghurst P, Marshall H. Consumer reporting of adverse
- 381 events following immunization (AEFI): Identifying predictors of reporting an AEFI. *Hum Vaccin*
- 382 *Immunother*. 2014;10(3):747–54. Available from: <https://doi.org/10.4161/hv.27459> PMID
- 383 24406315
- 384 12. Akanmori BD, Traore T, Balakrishnan M, Maure C, Zuber P. Vaccine Safety and Pharmacovigilance
- 385 in the African Region: Recent updates. Available from: [https://doi.org/10.29245/2578-](https://doi.org/10.29245/2578-3009%2F2018%2FSI.1112)
- 386 [3009%2F2018%2FSI.1112](https://doi.org/10.29245/2578-3009%2F2018%2FSI.1112)

- 387 13. Castilloux AM, Moride Y. Understanding reporting practices and perceptions of barriers in adverse  
388 events following immunisation surveillance: A cross – sectional survey of paediatricians in. 2021;  
389 Available from: <https://doi.org/10.1016/j.vaccine.2021.06.052> PMID: 34238607
- 390 14. Omoleke SA, Bamidele M, de Kiev LC. Barriers to optimal AEFI surveillance and documentation in  
391 Nigeria: Findings from a qualitative survey. PLOS Global Public Health. 2023;3(9): e0001658.  
392 Available from: <https://doi.org/10.1371/journal.pgph.0001658>
- 393 15. Masuka JT, Khoza S. Adverse events following immunisation (AEFI) reports from the Zimbabwe  
394 expanded programme on immunisation (ZEPI): An analysis of spontaneous reports in Vigibase®  
395 from 1997 to 2017. BMC Public Health. 2019;19(1):1–11. Available from:  
396 <https://doi.org/10.1186/s12889-019-7482-x>
- 397 16. Balakrishnan M, Maure C, Zuber P, Mihigo R. Vaccine Safety and Pharmacovigilance in the African  
398 Region: Recent Updates. 2018;80–8. Available from: [https://doi.org/10.29245/2578-  
399 3009%2F2018%2FSI.1112](https://doi.org/10.29245/2578-3009%2F2018%2FSI.1112)
- 400 17. Fagbemi S, Olaoye I, Fatiregun AA, Myrissa K, Kelaiditi E. Health Workers’ Knowledge, Attitudes,  
401 and Practices Immunization (AEFI) in Nigeria: A. 2023;37(4). Available from:  
402 <http://dx.doi.org/10.56808/2586-940X.1030>
- 403 18. Yamoah P, Bangalee V, Oosthuizen F. Knowledge and perceptions of adverse events following  
404 immunization among healthcare professionals in Africa: A case study from Ghana. Vaccines (Basel).  
405 2019;7(1). Available from: <https://doi.org/10.3390/vaccines7010028> PMID: 30857257
- 406 19. Sani, U.M., Oche, M., Raji, M.O., Ango, U.M., & Jiya, N.M. (2020). Knowledge, Attitude and Reporting  
407 Practices on Adverse Events Following Immunization among Routine Immunization Service

- 408 Providers in Health Facilities of Sokoto State, Available from:  
409 <https://doi.org/10.9734/ijtdh%2F2019%2Fv40i230226>
- 410 20. Fagbemi S, Olaoye I, Fatiregun AA, Myrissa K, Kelaiditi E. Health Workers' Knowledge, Attitudes,  
411 and Practices Immunization (AEFI) in Nigeria: A. 2023;37(4). Available from:  
412 <https://doi.org/10.56808/2586-940X.1030>
- 413 21. Malande OO, Munube D, Nakatugga R. Adverse events following immunization reporting and  
414 impact on immunization services in informal settlements in Nairobi, Kenya: a prospective mixed-  
415 methods study. 2021; Available from: <https://doi.org/10.11604/pamj.2021.40.81.25910>
- 416 22. Laryea EB, Frimpong JA, Noora CL, Tengey J, Bandoh D, Sabblah G, et al. Evaluation of the adverse  
417 events following immunization surveillance system, Ghana, 2019. PLoS One. 2022;17(3 March). 23.  
418 Masika CW, Atieli H, Were T. Knowledge, Perceptions, and Practice of Nurses on Surveillance of  
419 Adverse Events following Childhood Immunization in Nairobi, Kenya. Biomed Res Int. 2016;2016.  
420 Available from: <https://doi.org/10.1155/2016/3745298>
- 421 24. Yamoah P, Bangalee V, Oosthuizen F. Knowledge and perceptions of adverse events following  
422 immunization among healthcare professionals in Africa: A case study from Ghana. Vaccines (Basel).  
423 2019;7(1). Available from: <https://doi.org/10.3390/vaccines7010028>
- 424 25. Barry A, Olsson S, Minzi O, Bienvenu E, Makonnen E, Kamuhabwa A, Oluka M, Guantai A, Bergman  
425 U, van Puijenbroek E, Gurumurthy P, Aklillu E. Comparative Assessment of the National  
426 Pharmacovigilance Systems in East Africa: Ethiopia, Kenya, Rwanda and Tanzania. Drug Saf. 2020  
427 Apr;43(4):339-350. Available from: <https://doi.org/10.1007/s40264-019-00898-z>
- 428 26. Yenyi SE. Influence of Low Rate of Reporting of Adverse Events Following Immunization on  
429 Immunization Dropout. 2019; <https://scholarworks.waldenu.edu/dissertations/6709/>

- 430 27. Yamoah P, Oosthuizen F. An Assessment of the Reporting Pattern of Adverse Events Following  
431 Immunizations in VigiAccess. Glob J Health Sci. 2018;10(11):46. Available from:  
432 <https://doi.org/10.5539/gjhs.v10n11p46>
- 433 28. Mtenga S, Mhalu G, Osetinsky B, Ramaiya K, Kassim T, Hooley B, et al. Social-political and vaccine  
434 related determinants of COVID-19 vaccine hesitancy in Tanzania: A qualitative inquiry. PLOS Global  
435 Public-Health.2023;3(6): e0002010.Available from:  
436 <https://doi.org/10.1371/journal.pgph.0002010>
- 437
- 438
- 439

# Know Adverse events following immunization-AEFI

- Know what constitutes -AEFI
- Know type of AEFI cases to be reported
- Heard about AEFI surveillance
- Heard AEFI on reliable sources
- Being aware of reportable AEFI
- Know Modalities/methods for reporting AEFI
- Know AEFI cases subject for investigation
- Know that AEFI can be prevented
- Awareness on Methods to prevent AEFI

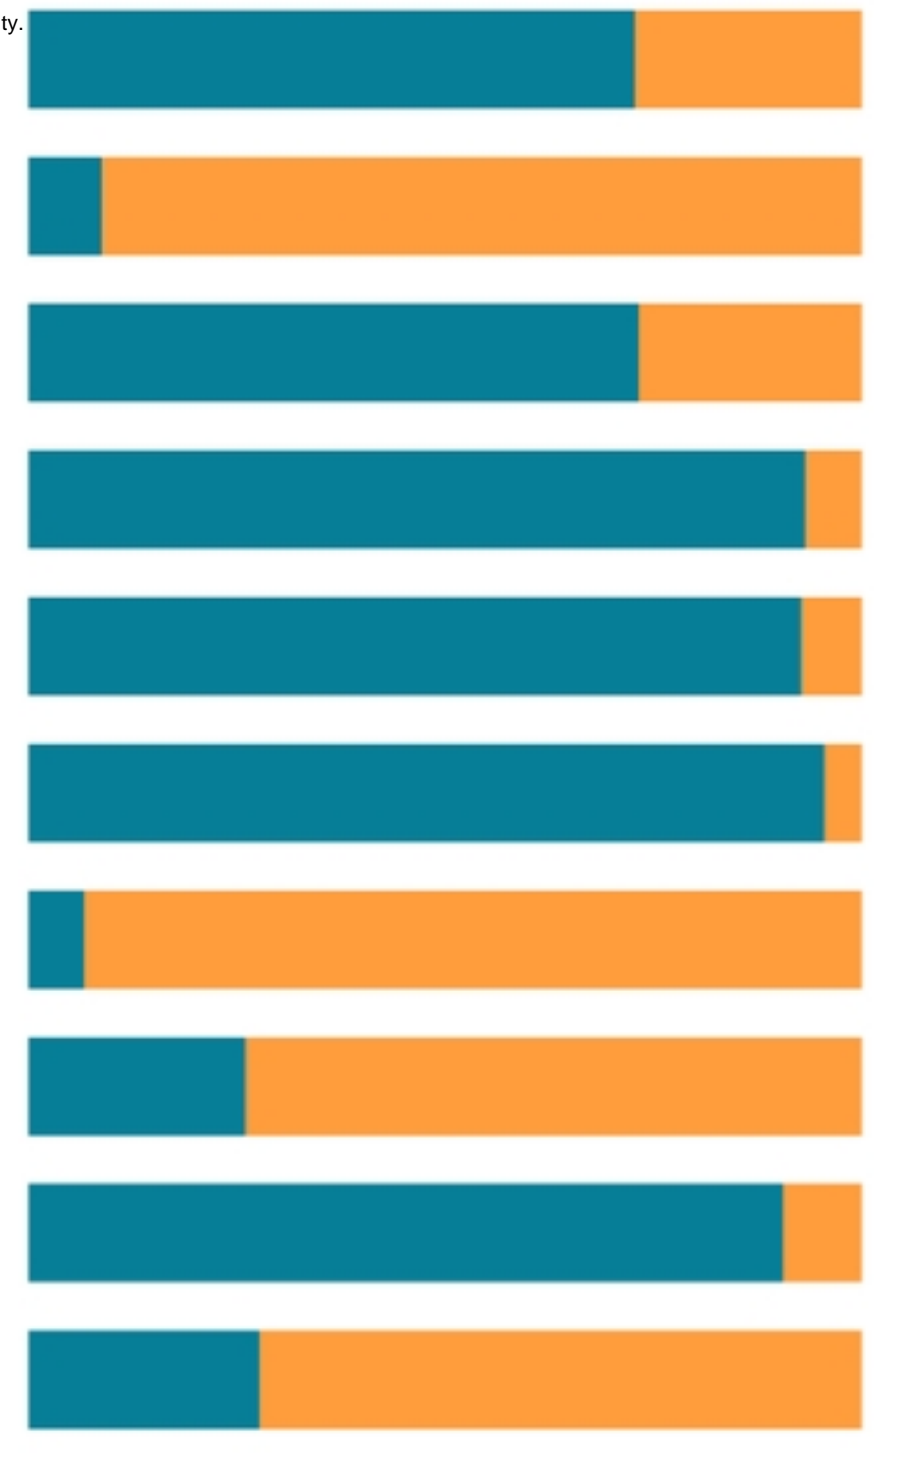

0 20 40 60 80 100

Proportion of participants (%)

Responses Yes No

It is made available under a [CC-BY 4.0 International license](https://creativecommons.org/licenses/by/4.0/).

**Items of Attitude towards Reporting AEFI**

Reporting AEFI is a professional obligation

AEFI reporting improves Patient care

AEFI reporting provides public confidence in vaccine

Reporting of AEFI may results HCP victimized

AEFI reporting creates additional work

AEFI reporting time-consuming activity

Training on AEFI reporting is important

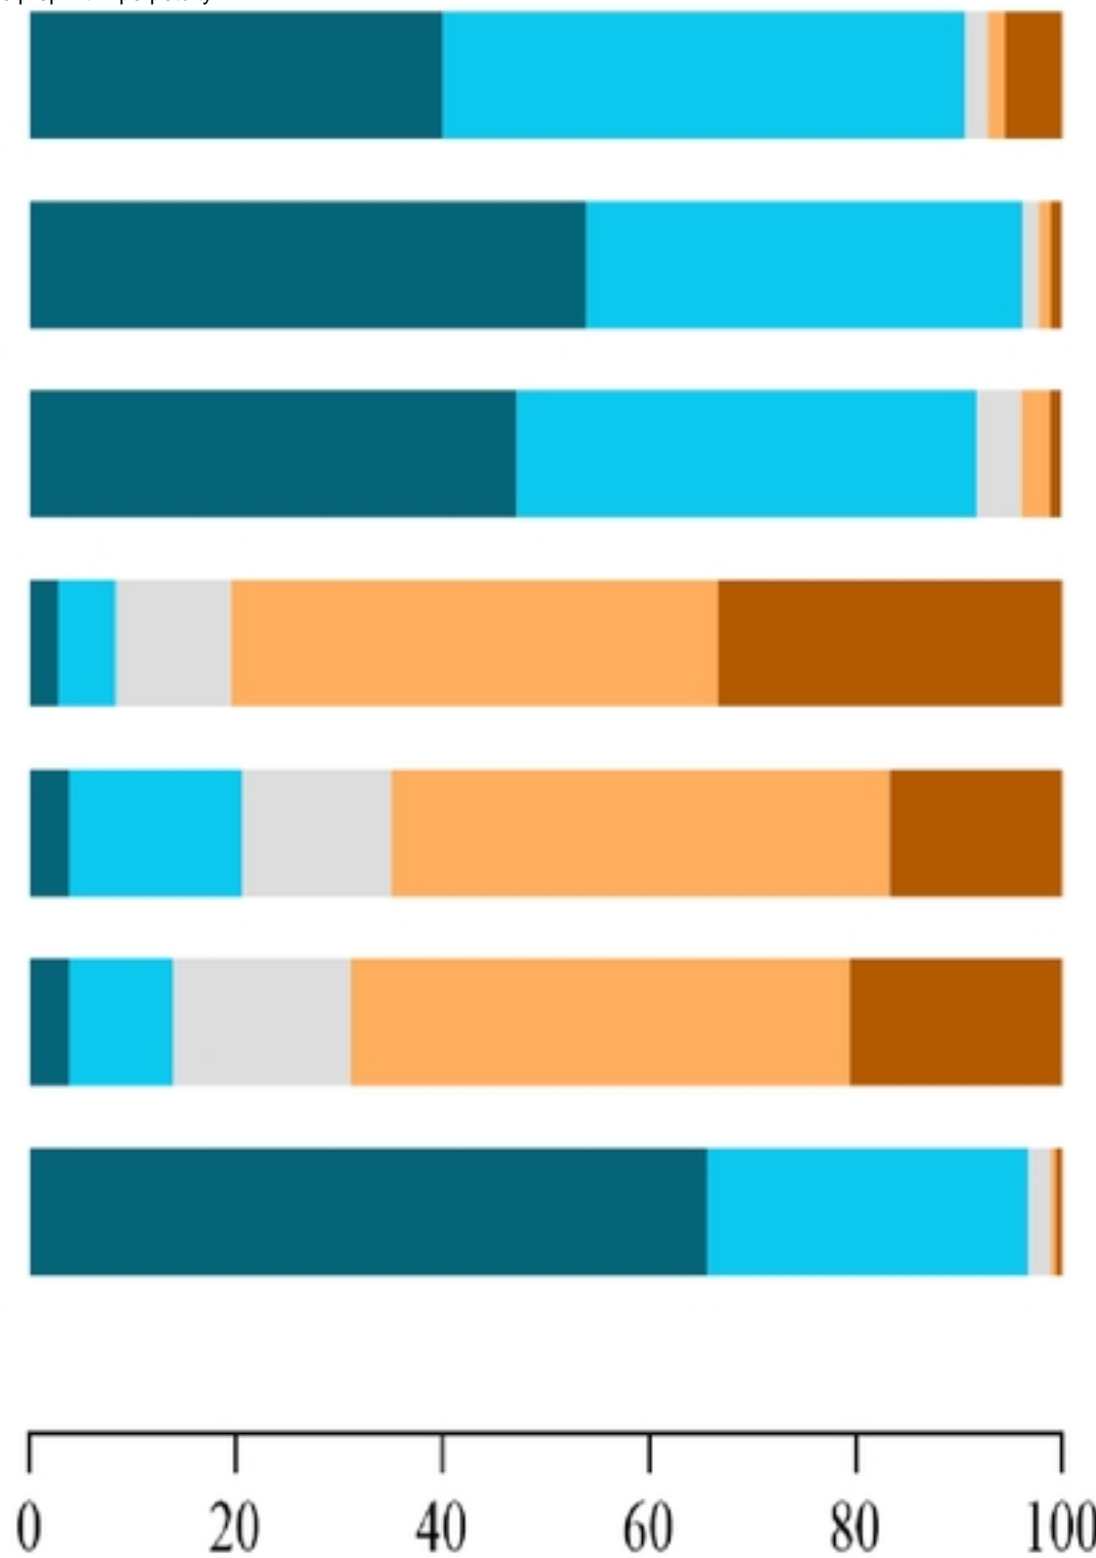

Proportion of participants (%)

Strongly agree    Agree    Uncertain    Disagree    Strongly disagree

Proportion of Participant's Attitude on AEFI reporting (n=180)

**Items of Practices**

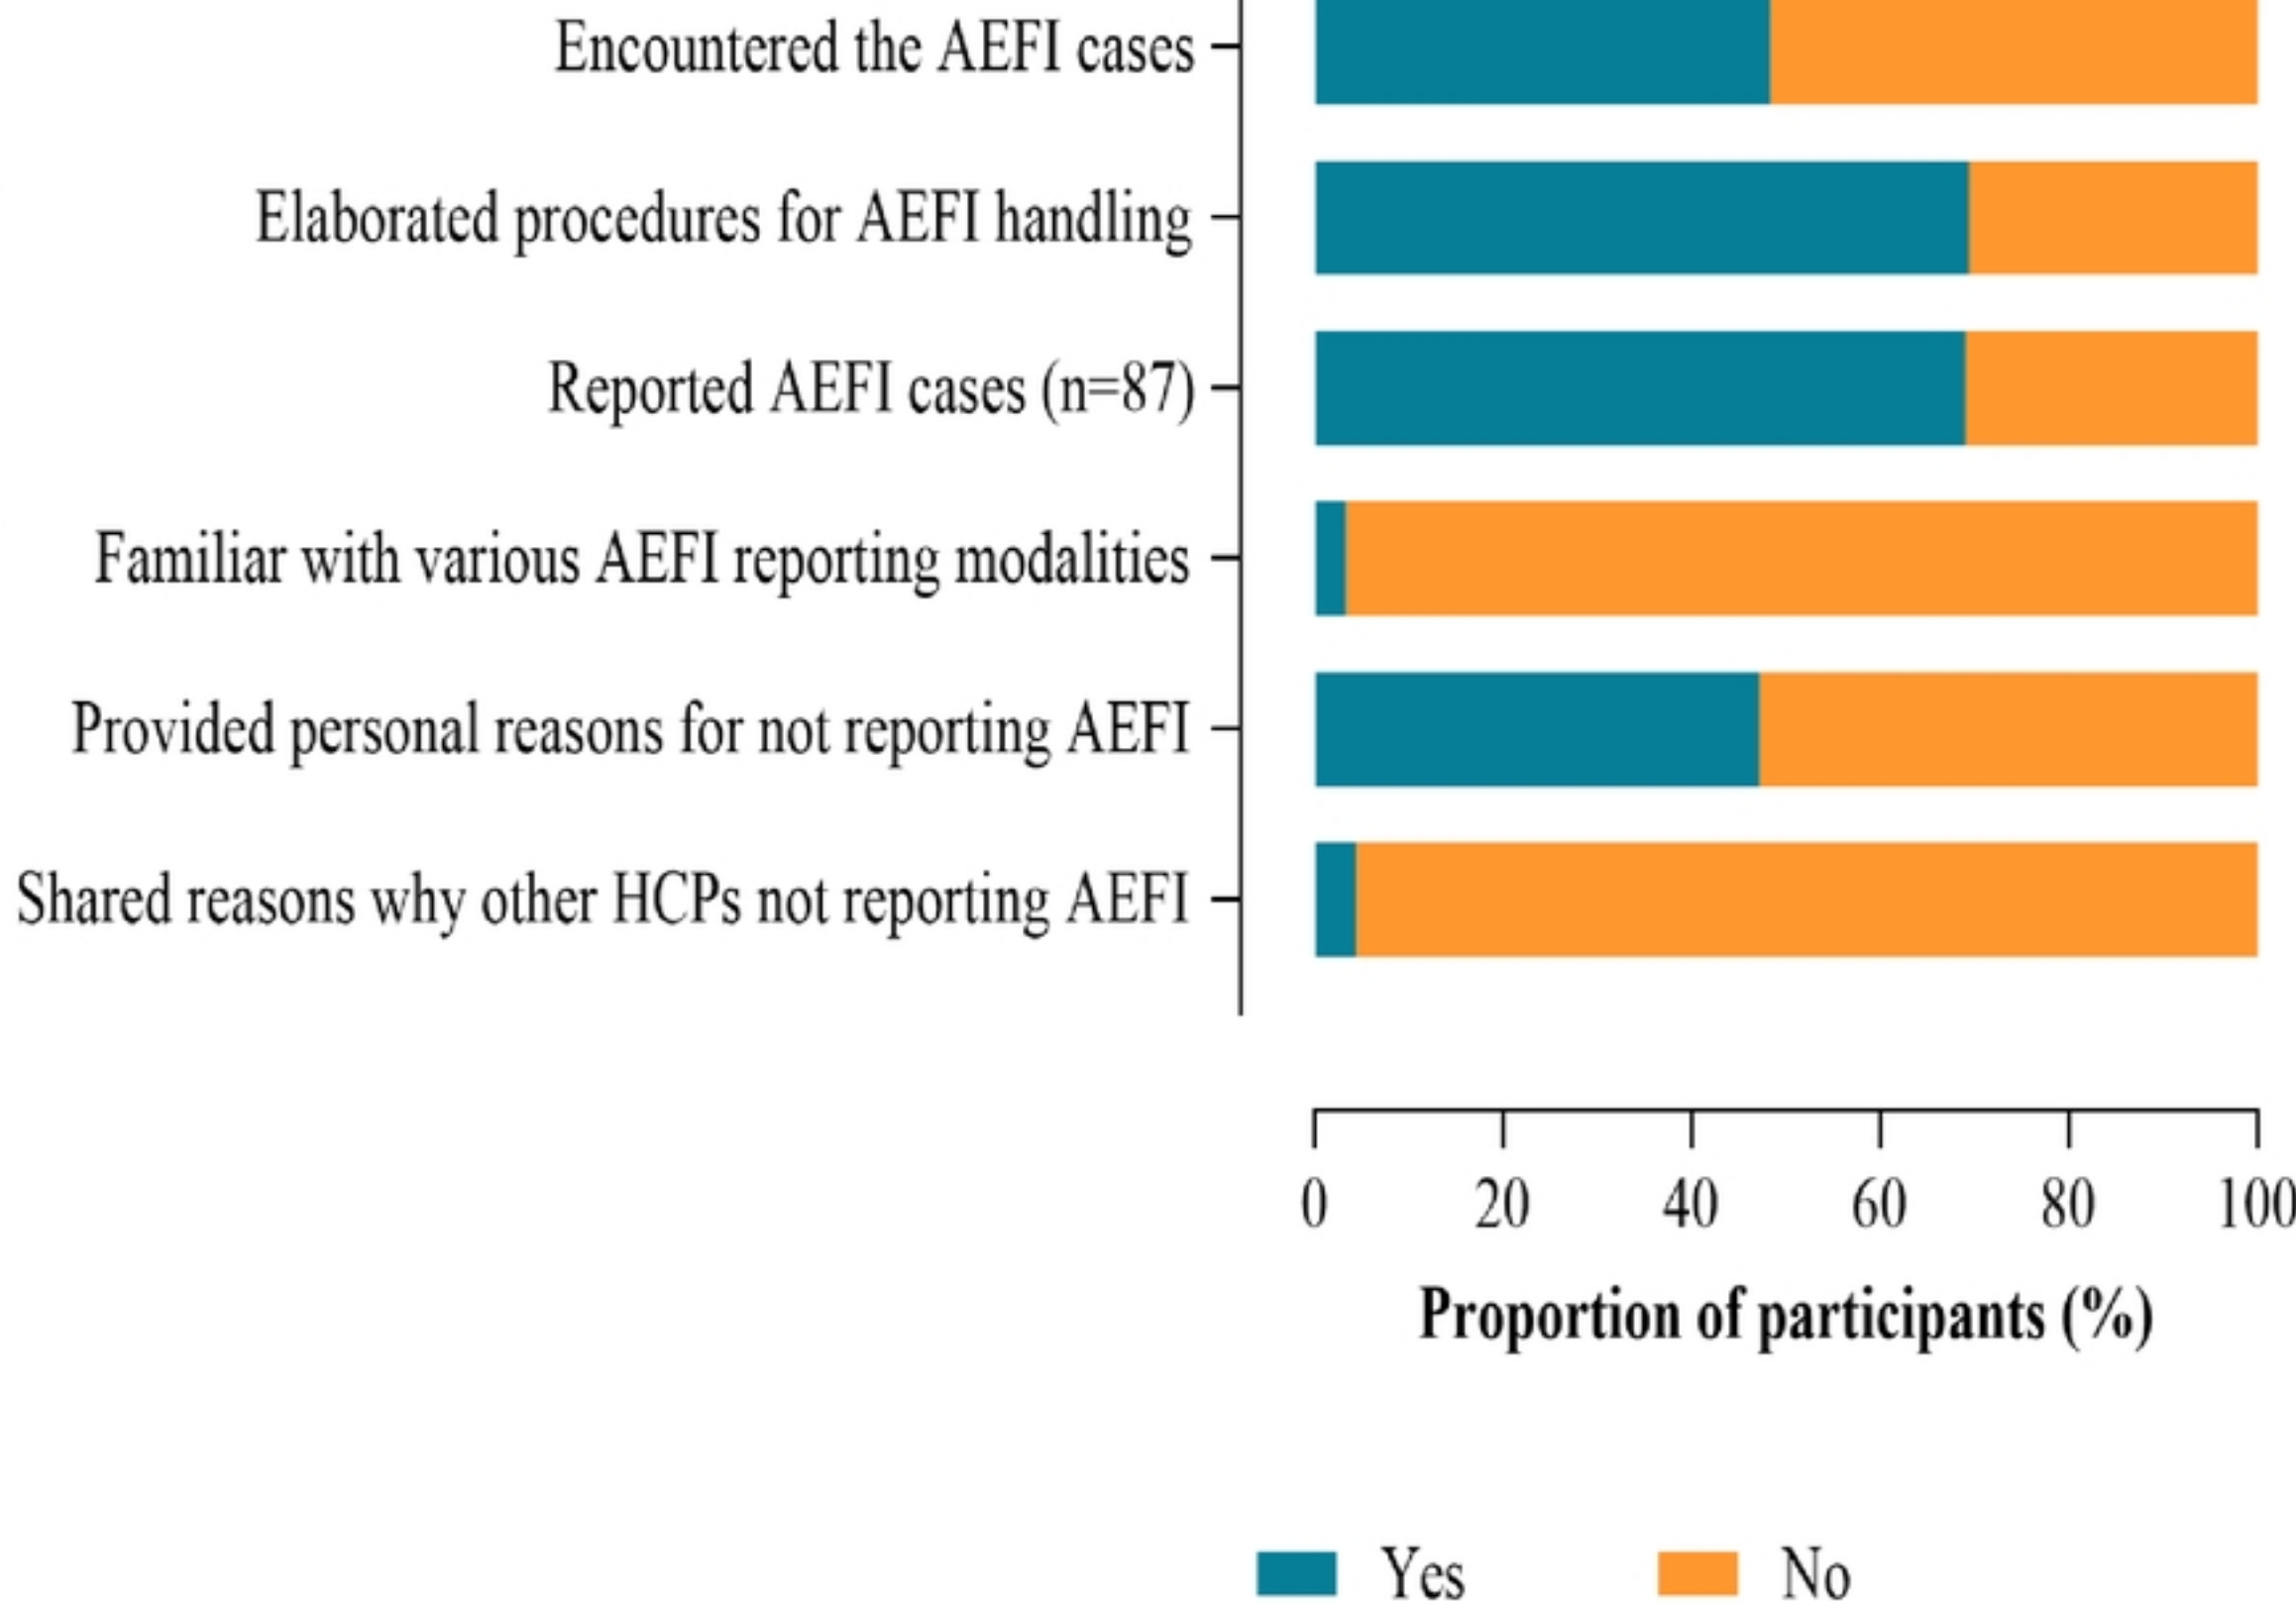

**Proportion of Participant's Practices of reporting AEFI (n=180)**



| Variable                                   | Frequency (n) | Percent (%) |
|--------------------------------------------|---------------|-------------|
| <b>Age group (years)</b>                   |               |             |
| ≤ 35                                       | 122           | 67.8        |
| >35                                        | 58            | 32.2        |
| Median age in years (IQR)                  | 32 (29, 38)   |             |
| <b>Gender</b>                              |               |             |
| Male                                       | 78            | 43.3        |
| Female                                     | 102           | 56.7        |
| <b>Marital status</b>                      |               |             |
| Married                                    | 114           | 63.3        |
| Unmarried                                  | 66            | 36.7        |
| <b>Cadre</b>                               |               |             |
| Nurse                                      | 74            | 41.1        |
| Clinician                                  | 47            | 26.1        |
| Pharmacy personnel                         | 22            | 12.2        |
| Others                                     | 37            | 20.6        |
| <b>Level of education</b>                  |               |             |
| Primary                                    | 2             | 1.1         |
| Secondary                                  | 21            | 11.7        |
| College                                    | 141           | 78.3        |
| University                                 | 16            | 8.9         |
| <b>Highest professional education</b>      |               |             |
| Certificate                                | 65            | 36.1        |
| Diploma                                    | 100           | 55.6        |
| Bachelor degree                            | 15            | 8.3         |
| <b>Working experience</b>                  |               |             |
| Junior (1 – 4 years)                       | 80            | 44.4        |
| Senior (5 – 10 years)                      | 60            | 33.3        |
| Principle (> 10 years)                     | 40            | 22.2        |
| <b>Involvement in routine Immunization</b> |               |             |
| Yes                                        | 137           | 76.1        |
| No                                         | 43            | 23.9        |

medRxiv preprint doi: <https://doi.org/10.1101/2024.11.22.24317763>; this version posted November 23, 2024. The copyright holder for this preprint (which was not certified by peer review) is the author/funder, who has granted medRxiv a license to display the preprint in perpetuity.

It is made available under a [CC-BY 4.0 International license](https://creativecommons.org/licenses/by/4.0/).

Socio-demographic characteristics of the Healthcare Providers (n

| Variable                                   | Knowledge on reporting AEFI |                | p – value |
|--------------------------------------------|-----------------------------|----------------|-----------|
|                                            | Adequate (%)                | Inadequate (%) |           |
| <b>Age group (years)</b>                   |                             |                |           |
| ≤ 35                                       | 34 (27.9)                   | 88 (72.1)      | 0.661     |
| >35                                        | 18 (31.0)                   | 40 (69.0)      |           |
| <b>Gender</b>                              |                             |                |           |
| Male                                       | 24 (30.8)                   | 54 (69.2)      | 0.626     |
| Female                                     | 28 (27.5)                   | 74 (72.5)      |           |
| <b>Marital status</b>                      |                             |                |           |
| Married                                    | 29 (25.4)                   | 85 (74.6)      | 0.180     |
| Unmarried                                  | 23 (34.8)                   | 43 (65.2)      |           |
| <b>Cadre</b>                               |                             |                |           |
| Nurse                                      | 18 (24.3)                   | 56 (75.7)      | 0.401     |
| Clinician                                  | 17 (36.2)                   | 30 (63.8)      |           |
| Pharmacy personnel                         | 8 (36.4)                    | 14 (63.6)      |           |
| Others                                     | 28 (75.7)                   | 9 (24.3)       |           |
| <b>Level of education</b>                  |                             |                |           |
| Primary                                    | 1 (50.0)                    | 1 (50.0)       | 0.388     |
| Secondary                                  | 5 (23.8)                    | 16 (76.2)      |           |
| College                                    | 39 (27.7)                   | 102 (72.3)     |           |
| University                                 | 7 (43.8)                    | 9 (56.3)       |           |
| <b>Highest professional education</b>      |                             |                |           |
| Certificate                                | 9 (13.8)                    | 56 (86.2)      | 0.004     |
| Diploma                                    | 37 (37.0)                   | 63 (63.0)      |           |
| Bachelor degree                            | 6 (40.0)                    | 9 (60.0)       |           |
| <b>Working experience</b>                  |                             |                |           |
| Junior (1 – 4 years)                       | 24 (30.0)                   | 56 (70.0)      | 0.093     |
| Senior (5 – 10 years)                      | 12 (20.0)                   | 48 (80.0)      |           |
| Principle (> 10 years)                     | 16 (40.0)                   | 24 (60.0)      |           |
| <b>Involvement in routine immunization</b> |                             |                |           |
| Yes                                        | 38 (27.7)                   | 99 (72.3)      | 0.543     |
| No                                         | 14 (32.6)                   | 29 (67.4)      |           |

Factors associated with knowledge level on reporting AEFI

| Variable                                   | Attitude toward reporting AEFI |              | p-value |
|--------------------------------------------|--------------------------------|--------------|---------|
|                                            | Positive (%)                   | Negative (%) |         |
| <b>Age group (years)</b>                   |                                |              |         |
| ≤ 35                                       | 84 (68.9)                      | 38 (31.1)    | 0.988   |
| >35                                        | 40 (69.0)                      | 18 (31.0)    |         |
| <b>Gender</b>                              |                                |              |         |
| Male                                       | 57 (73.1)                      | 21 (26.9)    | 0.289   |
| Female                                     | 67 (65.7)                      | 35 (34.3)    |         |
| <b>Marital status</b>                      |                                |              |         |
| Married                                    | 82 (71.9)                      | 32 (28.1)    | 0.247   |
| Unmarried                                  | 42 (63.6)                      | 24 (36.4)    |         |
| <b>Cadre</b>                               |                                |              |         |
| Nurse                                      | 53 (71.6)                      | 21 (28.4)    | 0.906   |
| Clinician                                  | 32 (68.1)                      | 15 (31.9)    |         |
| Pharmacy personnel                         | 15 (68.2)                      | 7 (31.8)     |         |
| Others                                     | 24(64.9)                       | 13(35.1)     |         |
|                                            |                                |              |         |
| <b>Level of education</b>                  |                                |              |         |
| Primary                                    | 0 (0.0)                        | 2 (100.0)    | 0.085   |
| Secondary                                  | 12 (57.1)                      | 9 (42.9)     |         |
| College                                    | 99 (70.2)                      | 42 (29.8)    |         |
| University                                 | 13 (81.3)                      | 3 (18.8)     |         |
| <b>Highest professional education</b>      |                                |              |         |
| Certificate                                | 44 (67.7)                      | 21 (32.3)    | 0.624   |
| Diploma                                    | 68 (68.0)                      | 32 (32.0)    |         |
| Bachelor degree                            | 12 (80.0)                      | 3 (20.0)     |         |
| <b>Working experience</b>                  |                                |              |         |
| Junior (1 – 4 years)                       | 58 (72.5)                      | 22 (27.5)    | 0.623   |
| Senior (5 – 10 years)                      | 39 (65.0)                      | 21 (35.0)    |         |
| Principle (> 10 years)                     | 27 (67.5)                      | 13 (32.5)    |         |
| <b>Involvement in Routine Immunization</b> |                                |              |         |
| Yes                                        | 96 (70.1)                      | 41 (29.9)    | 0.540   |
| No                                         | 28 (65.1)                      | 15 (34.9)    |         |
| <b>Knowledge on reporting</b>              |                                |              |         |
| Adequate                                   | 44 (84.6)                      | 8 (15.4)     | 0.004   |
| Inadequate                                 | 80 (62.5)                      | 48 (37.5)    |         |

Factors associated with the attitude toward reporting AEFI

| Variable               | Category               | Univariable analysis |             |         | Multivariable analysis |             |         |
|------------------------|------------------------|----------------------|-------------|---------|------------------------|-------------|---------|
|                        |                        | cPR                  | 95% CI      | p-value | aPR                    | 95% CI      | p-value |
| Age (years)            | group ≤ 35             | 1.24                 | 0.95 – 1.63 | 0.117   | 1.62                   | 1.12 – 2.34 | 0.011   |
|                        | >35                    | Ref                  |             |         |                        |             |         |
| Gender                 | Male                   | 0.88                 | 0.69 – 1.11 | 0.282   |                        |             |         |
|                        | Female                 | Ref                  |             |         |                        |             |         |
| Marital status         | Married                | 0.93                 | 0.74 – 1.17 | 0.531   |                        |             |         |
|                        | Unmarried              | Ref                  |             |         |                        |             |         |
| Your cadre             | Pharmacy personnel     | Ref                  |             |         |                        |             |         |
|                        | Clinician              | 1.003                | 1.883-0.537 | 0.992   |                        |             |         |
|                        | Others                 | 1.00                 | 0.70 – 1.44 | 0.580   |                        |             |         |
|                        | Nurse                  | 0.53                 | 0.11 – 2.63 | 0.287   |                        |             |         |
|                        | Clinician              | 1.003                | 1.883-0.537 | 0.992   |                        |             |         |
| Education              | Primary                | 0.89                 | 0.21 – 3.80 | 0.874   |                        |             |         |
|                        | Secondary              | 1.10                 | 0.64 – 1.90 | 0.731   |                        |             |         |
|                        | College                | 1.12                 | 0.72 – 1.76 | 0.616   |                        |             |         |
|                        | University             | Ref                  |             |         |                        |             |         |
| Professional           | Certificate            | 0.85                 | 1.67-0.432  | 0.638   |                        |             |         |
|                        | Diploma                | 1.08                 | 2.13-0.546  | 0.831   |                        |             |         |
|                        | Bachelor degree        | Ref                  |             |         |                        |             |         |
| Experience             | Junior (1 – 4 years)   | 0.91                 | 0.70 – 1.18 | 0.484   | 0.65                   | 0.45 – 0.95 | 0.025   |
|                        | Senior (5 – 10 years)  | 0.79                 | 0.58 – 1.07 | 0.122   | 0.65                   | 0.44 – 0.97 | 0.033   |
|                        | Principle (> 10 years) | Ref                  |             |         |                        |             |         |
| Routine Immunization   | Yes                    | 0.86                 | 0.68 – 1.09 | 0.210   |                        |             |         |
|                        | No                     | Ref                  |             |         |                        |             |         |
| Knowledge on reporting | Adequate               | 1.65                 | 1.36 – 2.01 | < 0.001 | 1.52                   | 1.24 – 1.86 | < 0.001 |
|                        | Inadequate             | Ref                  |             |         |                        |             |         |
| Attitude               | Positive               | 1.42                 | 1.06 – 1.91 | 0.020   | 1.29                   | 0.95 – 1.74 | 0.098   |
|                        | Negative               | Ref                  |             |         |                        |             |         |

medRxiv preprint doi: <https://doi.org/10.1101/2024.11.22.24317763>; this version posted November 23, 2024. The copyright holder for this preprint (which was not certified by peer review) is the author/funder, who has granted medRxiv a license to display the preprint in perpetuity. It is made available under a [CC-BY 4.0 International license](https://creativecommons.org/licenses/by/4.0/).

Key: cPR: crude Prevalence Ratio, aPR: adjusted Prevalence Ratio, Ref: Reference category

Univariable and multivariable analysis of the factors associated with
